## RESEARCH ARTICLE

## Effects of low-level laser therapy in adults with rheumatoid arthritis: A systematic review and meta-analysis of controlled trials

Ingrid Lourinho<sup>1</sup>, Tamara Sousa<sup>1</sup>, Roger Jardim<sup>1</sup>, Ana Carolina Pinto<sup>2,3</sup>, Natália Iosimuta<sup>4\*</sup>

**1** Master Student, Post-Graduation of Health Science—PPGCS, Federal University of Amapá - UNIFAP, Macapá, AP, Brazil, **2** Researcher at Centro Iberoamericano Cochrane—Biomedical Research Institute Sant Pau (IIB Sant Pau), Barcelona, Spain, **3** Cochrane Brazil, Center for Evidence-Based Health Studies and Health Technology Assessment, Department of Emergency Medicine, Post -Graduation in Evidence-Based Health Program, Federal University of São Paulo, São Paulo, Brazil, **4** Teacher of Physiotherapy Course, Post-Graduation of Health Science—PPGCS, Federal University of Amapá - UNIFAP, Macapá, AP, Brazil

\* [naticrod@unifap.br](mailto:naticrod@unifap.br)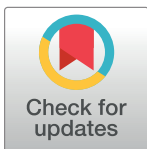

## OPEN ACCESS

**Citation:** Lourinho I, Sousa T, Jardim R, Pinto AC, Iosimuta N (2023) Effects of low-level laser therapy in adults with rheumatoid arthritis: A systematic review and meta-analysis of controlled trials. PLoS ONE 18(9): e0291345. <https://doi.org/10.1371/journal.pone.0291345>

**Editor:** Michael R. Hamblin, Massachusetts General Hospital, UNITED STATES

**Received:** May 26, 2023

**Accepted:** August 27, 2023

**Published:** September 8, 2023

**Copyright:** © 2023 Lourinho et al. This is an open access article distributed under the terms of the [Creative Commons Attribution License](https://creativecommons.org/licenses/by/4.0/), which permits unrestricted use, distribution, and reproduction in any medium, provided the original author and source are credited.

**Data Availability Statement:** All relevant data are within the paper and its [Supporting Information](#) files.

**Funding:** this work was supported by Coordination for the Improvement of Higher Education Personnel (CAPES), PROCAD 88887.200546/2018-00.

**Competing interests:** The authors have declared that no competing interests exist.

## Abstract

Rheumatoid arthritis (RA) is an inflammatory, systemic and chronic disease that mainly affects the joints. It is characterized mainly by pain, edema and joint stiffness, which can lead to significant loss of functional capacity and quality of life. Several physical therapy resources are used in the treatment of AR, such as low-level laser therapy (LLLT) and its analgesic and anti-inflammatory effects. However, the efficacy of LLLT in AR is still controversial. The objective of this study is to evaluate the efficacy of low-level laser therapy in adults with RA. Methods and findings: We searched MEDLINE, EMBASE, CENTRAL, PEDro, LILACS, IBECS, CUMED, SCIELO and ClinicalTrials.gov. Two researchers independently selected studies, extracted data, evaluated the risk of bias and assessed the certainty of evidence using GRADE approach. Disagreements were resolved by a third author. Meta-analyses were performed. Currently available evidence was from 18 RCTs, with a total of 793 participants. We found low-quality evidence suggesting there may be no difference between using infrared laser and sham in terms of pain, morning stiffness, grip strength, functional capacity, inflammation, ROM, disease activity and adverse events. The evidence is very uncertain about the effects of red laser compared to sham in pain, morning stiffness. The evidence is also very uncertain about the effects of laser acupuncture compared to placebo in functional capacity, quality of life, range of motion and inflammation. Conclusions: Thus, infrared laser may not be superior to sham in RA patients. There is insufficient information to support or refute the effectiveness of red laser, laser acupuncture and reflexology for treating patients with RA.

## Introduction

Rheumatoid arthritis (RA) is a disease of unknown etiology, characterized by systemic changes and inflammation of the synovial tissue of the joints, in the cartilage and bones. The prevalence

of RA between the years of 1980 and 2018 is 0.46% [1, 2]. Commonly affected joints include the peripheral synovial joints, such as metacarpal phalanges, ankles and wrists. However, there may also be involvement of the knee, shoulders, elbows and hips [3].

These impairments are accompanied by symptoms such as pain, morning stiffness and reduced range of motion, resulting in limitations in activities of daily living, self-care, work and leisure [4]. In addition, as it is a disease that has no cure, RA needs long-term pharmacological treatment for its control. However, its effects are tempered by the risk of adverse events. Non-pharmacological treatments are also needed to prevent joint deformities, which leads to high socioeconomic costs for the patient, the family and the health system [5, 6].

Therefore, physiotherapy plays an important role in the treatment of RA, as it includes several therapeutic modalities that aim at improving functional capacity and at minimizing the impact of the disease on the patients' quality of life. Among the approaches, the electrophysical agents, low-level laser therapy (LLLT), has gained increasing recognition for having physiologic effects, mainly mediated by photochemical actions at the cellular level that promote an increase in tissue microcirculation and may lead to anti-inflammatory and analgesic benefits [7–11]. However, its effects in patients with RA are controversial.

A previous systematic review suggests that LLLT can be considered to relieve pain and functional stiffness in RA [12]. However, several studies have been published since then, and this new evidence has not been summarized. Therefore, the aim of this study was to assess the efficacy of LLLT in adults with RA.

## Methods

### Data sources and searches

On July 6<sup>th</sup>, 2022, we searched MEDLINE, Cochrane Central Register of Controlled Trials (CENTRAL), Embase, Latin American and Caribbean Health Sciences Literature (LILACS), IBECs, CUMED, Physiotherapy Evidence Database (PEDro) and Scientific Electronic Library Online (SciELO) using relevant descriptors and synonyms, adapting the search to the specifications of each database (S1 Table). To find additional studies, we also searched the Clinicaltrials.gov and searched the reference lists of included studies. We applied no language or date restrictions.

### Study selection

We included randomized clinical trials evaluating the effects of continuous low-level laser therapy or pulse beam (classes III—ranging from 632.8–1000 nm) [9, 12] in patients with RA diagnosed by American College of Rheumatology (ACR) criteria [13, 14], ACR/European League Against Rheumatism (EULAR) [15] working group or using any validated classification criteria. We used Rayyan app (<https://www.rayyan.ai/>) to screen the titles and abstracts of search results, retrieve the full-text reports of all potentially eligible studies and select them for inclusion [16]. Studies were included if they randomized adult participants with rheumatoid arthritis to receive LLLT versus any other treatment, sham, or no treatment, and compared its effects considering the following outcomes: pain, functional capacity, adverse events, inflammation, disease activity, range of motion, morning stiffness, muscle strength or quality of life.

### Data extraction and quality assessment

We performed this systematic review following the Cochrane Handbook recommendations [17] and reported it in accordance with the Preferred Reporting Items for Systematic Reviews and Meta-Analysis (PRISMA) recommendations (S2 Table). We registered this systematic

review protocol in the International Prospective Register of Systematic Reviews (PROSPERO: CRD42020158163). To extract data from included studies, we used a predefined form. We collected detailed information on the populations, interventions, comparisons, outcomes, funding sources and conflicts of interest. We attempted to contact the authors of included studies to check missing details. We used the Cochrane risk-of-bias tool to assess the risk of bias inherent to each outcome of the included studies [17, 18]. We then assessed the certainty (quality) of body of evidence using the Grading of Recommendations Assessment, Development and Evaluation (GRADE) (S3 Table) [17]. Two review authors (INLA and NCRI) independently selected studies, extracted data, assessed the risk of bias and the certainty of evidence. We resolved disagreements through discussion or when required by consulting a third author (ACPNP).

## Data synthesis and analysis

After extraction, we analyzed the data using *Review Manager 5.4.1*. We analyzed dichotomous data as risks ratios (RRs), and continuous data as mean differences (MDs) or standardized mean differences (SMDs). If treatments, participants, and the underlying clinical question were similar enough for pooling to make sense, we undertook meta-analyses using a random-effects model. We used the  $I^2$  statistics to measure heterogeneity in each analysis. We planned to carry out subgroup analyses considering age, treatment duration and LLLT parameters. We also planned to perform sensitivity analyses by exploring the influence of high risk of bias studies on treatment effects [17].

## Results

### Search strategy and selection of the studies

Our search strategy yielded a total of 1,339 records. After removing duplicated records, we examined 1,124 titles and abstracts. After screening titles and abstracts, 1,087 studies were excluded for not being directly related to the review question and retrieved 38 full-text reports (37 found through database and registers search and one through citation searching) for further scrutiny. Of those, 17 reports had insufficient data to include or exclude. As recommended by Cochrane Handbook [19], we did not exclude these studies, and when possible, we contacted authors for additional information. As no answers were received up to the date of submission of this paper, these studies were classified as studies awaiting classification and details on these reports are provided in S4 Table. To retrieve additional data, we also searched trial registers, such as Clinicaltrials.gov [20]. However, no additional trials were found. We excluded three reports [21–23] because they were not randomized. Finally, we included 18 studies in this review. The flow diagram can be consulted in Fig 1.

**Included studies.** We included 18 RCTs with a total of 793 participants. The included studies had intervention durations ranging from 4 weeks and 6 months.

The following comparisons were found:

1. Infrared laser versus sham (10 studies; 366 participants) [24–33]
2. Red laser versus sham (two studies; 89 participants) [34, 35];
3. Infrared laser versus laser acupuncture (one study; 40 participants) [36];
4. Laser acupuncture versus reflexology (one study; 30 participants) [37];
5. Laser acupuncture + teletherapy + methotrexate versus teletherapy + methotrexate (one study; 60 participants) [38];

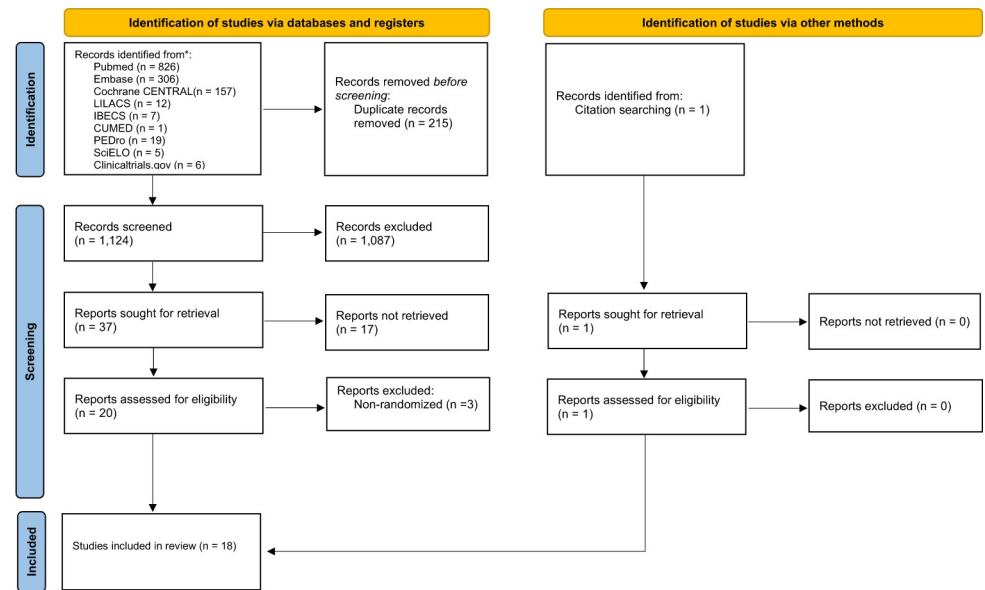

**Fig 1. Flow diagram.**

<https://doi.org/10.1371/journal.pone.0291345.g001>

6. Laser acupuncture + teletherapy versus teletherapy (one study; 60 participants) [39];
7. Infrared laser + red laser versus sham laser + naproxen (one study; 34 participants) [40];
8. Infrared laser + red laser versus naproxen (one study; 22 participants) [40];
9. Infrared laser + methotrexate + Non-steroidal anti-inflammatory drugs (NSAIDs) on demand versus methotrexate + NSAIDs on demand (one study; 114 participants) [41].

More details can be found in [Table 1](#) and laser therapy parameters used in each study are detailed in [Table 2](#). About the information not described in the included studies, we contacted the corresponding authors of included studies and asked whether they could provide information on those parameters, but no answer was received up to the date we submitted this article.

**Risk of bias in included studies.** Among the 18 included studies, 17 had an overall high risk of bias and one study [30] had “some concerns” on the overall risk of bias. The judgments for each domain of each risk of bias outcome are detailed in [Fig 2](#). All results of the verification certainty assessment can be found in [S4 Table](#).

## Effects of interventions

**Comparison: Infrared versus sham. Pain.** Four studies [24, 25, 27, 30] used a Visual Analogue Scale (VAS) to assess pain. Pooled data from these 4 RCTs, with a total of 176 participants, suggest there may be small or no differences in pain between using laser infrared and sham after 4 to 8 weeks (MD -0.36; 95% CI -1.50 to 0.78; low certainty of evidence) ([Fig 3A](#)).

In addition to these studies, Silva et al. [33] evaluated pain with the Br-MPQ Pain Questionnaire. In this study, there was less pain in the sham group (80%) and a result of greater pain in the irradiated group (40%). Johannsen et al. [29] assessed pain using the 0–12 score range instrument and found a reduction on pain score in the infrared laser group, but when data were corrected for disease variation, the effect disappeared. Goldman et al. [26] also reported a significant difference favoring infrared laser group for pain but did not provide further

Table 1. Characteristics of randomized controlled studies included.

| Study, year, location                  | Participants                                                                                                                                                 | Time since diagnosis              | RA Severity | Sample size (n) | Age (Years) mean                             | Intervention                          | Time of analysis                                   | Outcomes                                                                                                                                                                           | Intergroup Results p-value                                                                                     |
|----------------------------------------|--------------------------------------------------------------------------------------------------------------------------------------------------------------|-----------------------------------|-------------|-----------------|----------------------------------------------|---------------------------------------|----------------------------------------------------|------------------------------------------------------------------------------------------------------------------------------------------------------------------------------------|----------------------------------------------------------------------------------------------------------------|
| 1.Walker et al (1987); California [35] | RA diagnoses according to ACR                                                                                                                                | ND                                | ND          | I: 34<br>C: 38  | I: 61.5<br>C:60                              | I: LLLT<br>C: Sham                    | BL and on 10 weeks                                 | Pain (VAS)                                                                                                                                                                         | p = 0.07                                                                                                       |
| 2.Adly et al (2017); Egypt [37]        | Patients fom Kasr El Ainy Medical School and National Institute of Laser Enhanced Sciences, Cairo University, Egypt. (Diagnosis criteria were not described) | ranging from 7 months to 10 years | ND          | I: 15<br>C: 15  | I: 61.83<br>C: 63.2                          | I: acupuncture laser<br>C:Reflexology | BL and on 4 weeks                                  | Functional Capacity (HAQ)<br>QoL (RAQoL)<br>ROM of DFF, PFF, WF, WE and WA (goniometer)<br>Inflammation (IL-6)                                                                     | p > 0.05<br>p > 0.05<br>p < 0.05<br>p < 0.05                                                                   |
| 3.Miyagi et al (1989); Japan [31]      | RA diagnoses according to ACR                                                                                                                                | I: 12.8 years<br>C: 10.1 year     | ND          | I: 33<br>C: 35  | I: 56.8<br>C: 54.5                           | I: LLLT<br>C: Sham                    | BL and on 5 weeks                                  | Pain (points scale)<br>Functional Capacity (15 min of walk)<br>Grip Strength<br>Morning stiffness (min)<br>Inflammation                                                            | p > 0.05<br>p < 0.01<br>p > 0.05<br>p > 0.05<br>p > 0.05                                                       |
| 4.Hall et al (1994); England [27]      | RA patients with synovitis in MCP and PIP joints (Diagnosis criteria were not described)                                                                     | I:12.2 years<br>C:9.3 years       | ND          | I: 20<br>C: 20  | I: 67.1<br>C: 60.9                           | I: LLLT<br>C: Sham                    | BL and on 4 weeks;<br>follow-up of 1 and 3 months. | Pain (VAS)<br>Functional Capacity (HAQ)<br>Grip Strength<br>ROM (goniometer)<br>Inflammation                                                                                       | ND                                                                                                             |
| 5.Meireles et al (2010); Brazil [30]   | RA diagnoses according to ACR                                                                                                                                | ND                                | ND          | I: 41<br>C: 41  | I: 52.44<br>C: 53.17                         | I: LLLT<br>C: Sham                    | BL and on 8 weeks                                  | Pain (VAS)—(RH/LH)<br>Functional Capacity (HAQ)<br>Morning stiffness (VAS) - (RH/LH)<br>Grip Strength—(RH/LH) (dynamometer)<br>ROM (goniometer)<br>Inflammation (likert scale 1–5) | p = 0.16 /<br>p = 0.15<br>p = 0.69<br>p = 0.27 /<br>p = 0.06<br>p = 0.01 /<br>p = 0.45<br>p = N.R.<br>p = 0.01 |
| 6.Palmgren et al (1989); Denmark [32]  | RA (Diagnosis criteria were not described)                                                                                                                   | ND                                | ND          | I: 19<br>C: 16  | I: (F: 61.1/ M: 66.0)<br>C:(F: 57.5/ M: 8.0) | I: LLLT<br>C: Sham                    | BL and on 4 weeks                                  | Pain (VAS)<br>Grip Strength (standardized balloon)<br>Morning stiffness                                                                                                            | ND                                                                                                             |
| 7.Silva et al (2009); Brazil [33]      | Acute RA patients in MCP and PIP joints (Diagnosis criteria were not described)                                                                              | ND                                | ND          | I: 5<br>C: 5    | I: 56,6 (19,9)<br>C: NR                      | I: LLLT<br>C: Sham                    | BL and on 5 weeks                                  | Pain (MPQ)                                                                                                                                                                         | p = 0.84                                                                                                       |
| 8.Ekim (2007); Turkey [24]             | patients with RA and Carpal tunnel syndrome (Diagnosis criteria were not described)                                                                          | I: 5.2 years<br>C:5 years         | ND          | I: 10<br>C: 9   | I: 48 (11)<br>C: 55 (6)                      | I: LLLT<br>C: Sham                    | BL and on 10 days, and follow-up in 3 months       | Functional Capacity (Functional Status Scale)<br>Grip Strength (dinamometer)                                                                                                       | ND                                                                                                             |

(Continued)

Table 1. (Continued)

| Study, year, location                          | Participants                                                                                                 | Time since diagnosis            | RA Severity | Sample size (n)          | Age (Years) mean        | Intervention                                                                      | Time of analysis                                                  | Outcomes                                                                                                                                       | Intergroup Results p-value                                                                         |
|------------------------------------------------|--------------------------------------------------------------------------------------------------------------|---------------------------------|-------------|--------------------------|-------------------------|-----------------------------------------------------------------------------------|-------------------------------------------------------------------|------------------------------------------------------------------------------------------------------------------------------------------------|----------------------------------------------------------------------------------------------------|
| 9. <b>Johannsen et al (1994); Denmark [29]</b> | RA patients with I and II functional level according to steinbrocker (Diagnosis criteria were not described) | ND                              | ND          | I: 10<br>C: 12           | I:59 C:62               | I: LLLT<br>C: Sham                                                                | BL and on 4 weeks                                                 | Pain (1–12 score range)<br>Grip Strength (dinamometer)<br>Morning stiffness (ordinal scale 0–2)<br>Inflammation (CPR)                          | ND                                                                                                 |
| 10. <b>Bliddal et al (1987); Denmark [34]</b>  | Acute RA patients in MCP joints (Diagnosis criteria were not described)                                      | ND                              | ND          | I: 9<br>C: 8             | I: 57 (41–79)<br>C: ND  | I: LLLT<br>C: Sham                                                                | BL, 3 weeks, and follow-up in 4 weeks                             | Pain (VAS)<br>Morning stiffness                                                                                                                | p < 0.05 (on 3 weeks)<br>p > 0.05                                                                  |
| 11. <b>Goats et al (1996); Scotland [25]</b>   | Acute RA patients from Gartnavel General Hospital (Diagnosis criteria were not described)                    | I:7.5 years<br>C:9.8 years      | ND          | I: 25<br>C:10            | I: 57 (14)<br>C: 64 (8) | I: LLLT<br>C: Sham                                                                | BL, 1 <sup>st</sup> , 3 <sup>rd</sup> and 6 <sup>th</sup> months. | Pain (VAS)<br>Functional Capacity (HAQ)<br>Morning stiffness (hours)<br>Inflammation (CRP)<br>ROM (goniometer)<br>Disease activity level (RAI) | ND                                                                                                 |
| 12. <b>Adly et al (2021A); Egypt [36]</b>      | RA diagnosis according to ACR and EULAR                                                                      | ND                              | ND          | I: 20<br>C:20            | I: 70.9<br>C: 70.3      | I: LLLT<br>C: Laser acupuncture                                                   | BL, 12 weeks                                                      | Functional Capacity (HAQ)<br>QoL (RAQoL)<br>Inflammation (IL-6)                                                                                | p > 0.05<br>p < 0.05<br>P > 0.05                                                                   |
| 13. <b>Adly et al (2021B); Egypt [42]</b>      | RA diagnosis according to ACR and EULAR                                                                      | ND                              | ND          | I: 30<br>C:30            | E: 68.8<br>C:69.1       | I: Laser acupuncture + teletherapy (AEV)<br>C: teletherapy (AEV)                  | BL, 4 weeks                                                       | Functional Capacity (HAQ)<br>QoL (RAQoL)<br>Inflammation (CRP/IL-6)                                                                            | p < 0.05<br>p < 0.05<br>p < 0.05/<br>p < 0.05                                                      |
| 14. <b>Muhamed et al (2021); Iraq [40]</b>     | RA diagnosis according to ACR                                                                                | ND                              | ND          | I: 12<br>C1: 12<br>C2:10 | Mean age of 49.6        | I: LLLT (red +infrared)<br>C1: sham LLLT + naproxeno<br>C2: naproxeno             | BL, 7 weeks                                                       | Pain (VAS)<br>Morning stiffness<br>DAS28<br>Inflammation (CRP)                                                                                 | p = 0.01<br>p = 0.05<br>p = 0.02<br>p > 0.05                                                       |
| 15. <b>Adly et al., (2022); Egypt [38]</b>     | RA diagnosis according to ACR and EULAR                                                                      | ND                              | ND          | I:30<br>C:30             | I: 68.87<br>C: 69.13    | I: Laser acupuncture + teletherapy + methotrexate<br>C: teletherapy +methotrexate | BL, 4 weeks                                                       | Functional Capacity (HAQ)<br>QoL (RAQoL)<br>Inflammation (CRP/IL-6)                                                                            | p > 0.05<br>p > 0.05<br>p < 0.05/<br>p < 0.05                                                      |
| 16. <b>Goldman et al. (1980);U.S.A [26]</b>    | RA classified by American Rheumatism Association criteria                                                    | Ranging from 1 year to 26 years | ND          | I: ND<br>C: ND<br>A: 30  | I: ND<br>C: ND          | I: LLLT<br>C: Sham                                                                | BL, 10 weeks, and 3 months                                        | Erythema<br>Pain<br>Flexion<br>Grip strength<br>PIP Range of motion<br>MCP flexion                                                             | Significant<br>Significant<br>Non significant<br>Significant<br>Non significant<br>Non significant |

(Continued)

Table 1. (Continued)

| Study, year, location                       | Participants                                                                                     | Time since diagnosis            | RA Severity | Sample size (n)  | Age (Years) mean | Intervention                                                | Time of analysis | Outcomes                                                                                              | Intergroup Results p-value                                                                                                        |
|---------------------------------------------|--------------------------------------------------------------------------------------------------|---------------------------------|-------------|------------------|------------------|-------------------------------------------------------------|------------------|-------------------------------------------------------------------------------------------------------|-----------------------------------------------------------------------------------------------------------------------------------|
| 17. Heussler et al., (1993); Australia [28] | RA and bilateral involvement of their MCP and PIP joints (Diagnosis criteria were not described) | Ranging from 2 year to 14 years | ND          | I: 25*<br>C: 25* | I: ND<br>C: ND   | I: LLLT<br>C: Sham                                          | BL, 5 weeks      | Pain<br>morning stiffness<br>Swollen<br>ROM<br>Grip strength<br>Inflammation (CRP)<br>Adverse effects | Non significant<br>Non significant<br>Non significant<br>Non significant<br>Non significant<br>Non significant<br>Non significant |
| 18. Zhuravleva et al., (2021); Russian [41] | RA patients (Diagnosis criteria were not described)                                              | ND                              | ND          | I: 57<br>C: 57   | I: ND<br>C: ND   | I: LLLT + methotrexate + NSAIDS<br>C: methotrexate + NSAIDS | BL, 6 months     | Pain<br>morning stiffness<br>N of patients needing NSAIDS                                             | MD -0.51 (IC 95% -0.60 to -0.42)**<br>MD -17.8 (IC 95% -19.67 to -15.93)**<br>RR 2.1 (IC 95% 1.09 to 4.05)**                      |

RA, rheumatoid arthritis; ACR: American College of Rheumatology; I: intervention group; C: control group; A: all; BL: baseline; HAQ: health assessment questionnaire; QoL: quality of life; RAQoL: rheumatoid arthritis quality of life; ROM: range of motion; DFF: dorsiflexion of foot; PFF: plantar flexion of foot; WF: wrist flexion; WE: wrist extension; WA: abduction wrist; VAS, visual analogue scales MCP, metacarpophalangeal joint; PIP, proximal interphalangeal joint; IL-6: interleukine 6; CRP: C-reactive protein; RAI: Ritchie Articular Index; EULAR: European Alliance of Associations for Rheumatology; DAS28: Disease activity score; LLLT = Low-level laser therapy; AEV: aerobic and virtual exercises; NSAIDS: Non-steroidal anti-inflammatory drugs; Ga-Al-Ar: gallium-aluminium-arsenate; ND: not described

\*hands were randomized

\*\*significant difference

<https://doi.org/10.1371/journal.pone.0291345.t001>

information for analysis. The results of the 3 studies were not pooled with the other 4 RCTs because they were reported in ways that did not allow pooling.

**Morning stiffness.** Four studies evaluated the duration of morning stiffness [25, 27, 30, 31]. To morning stiffness outcome, data from four RCTs were pooled to meta-analysis with a total of 209 individuals. The meta-analysis results showed that there is low certainty of evidence for small or no difference in morning stiffness between using laser infrared compared to sham after 1 to 2 months (MD = - 10.84; 95% CI -49.29 to 27.61) (Fig 3B). Heussler et al. [28] also evaluated the duration of morning stiffness and did not find a significant difference between groups, but did not provide further information for analysis.

**Handgrip strength.** Three studies [24, 30, 31] evaluated handgrip strength and the pooled data from these trials, with a total of 169 participants, suggest there may be small or no difference in handgrip strength between using laser infrared and sham (SMD -0.15; 95% CI -0.85 to 0.54; low certainty of evidence) (Fig 3C). Heussler et al. [28] and Johannsen et al. [29] reported they did not find a significant difference between groups. Goldman et al. [26] and Palmgren et al. [32] reported a significant difference favoring infrared laser group for grip strength. However, these studies did not provide further information for analysis. Hall et al. [27] presented data only in graphs without further information for analysis.



Table 2. Low-level laser therapy parameters of included studies.

| Studies                     | laser type    | Wavelength (nm)                                      | Fluency J/cm <sup>2</sup> | Power(mW); time(s)   | Irradiance (W/cm <sup>2</sup> ) | Number of points; number of sessions                                           | Energy (J)   |
|-----------------------------|---------------|------------------------------------------------------|---------------------------|----------------------|---------------------------------|--------------------------------------------------------------------------------|--------------|
| 1. Walker et al (1987)      | AlAs He-Ne    | 632.5; red                                           | 0.0075                    | 1; 30                | 47.7                            | 3 (radial, median and saphenous nerve on each painful joint); 3 sessions/ week | ND           |
| 2. Adly et al (2017)        | GaAlAs        | 904; infrared                                        | ND                        | 100; ND              | 100                             | ND; 3 sessions/ week                                                           | 4            |
| 3. Miyagi et al (1989)      | GaAlAs        | 830; infrared                                        | ND                        | 20;30                | ND                              | 6 (the knee joint); 2 sessions/ week                                           | ND           |
| 4. Hall et al (1994)        | GaAlAs        | 820; infrared                                        | 3.600                     | 40;90                | ND                              | 4 on each MCP and PIP joints; ND                                               | 3.6          |
| 5. Meireles et al (2010)    | GaAlAs        | 785; infrared                                        | 3                         | 70; ND               | ND                              | 14; 2 sessions/ week                                                           | ND           |
| 6. Palmgren et al (1989)    | GaAlAs        | 820; infrared                                        | 3.58                      | 15;60                | ND                              | 8; 3 sessions/ week                                                            | ND           |
| 7. Silva et al (2009)       | Infrared      | 904; infrared                                        | ND                        | 8; 195               | ND                              | ND; 2 sessions/ week                                                           | 1.55         |
| 8. Ekim et al (2007)        | GaAlAs        | 780; infrared                                        | ND                        | 50; 600              | ND                              | 5; 5 sessions/ week                                                            | 7.5          |
| 9. Johannsen et al (1994)   | GaAlAs        | 830; infrared                                        | ND                        | 21; ND               | ND                              | 4 on two MCP joints; 3 sessions/ week                                          | 2,9          |
| 10. Bliddal et al (1987)    | He-Ne         | 633; red                                             | 6                         | 10;300               | ND                              | ND; 3 sessions/ week                                                           | ND           |
| 11. Goats (1996)            | GaAlAs        | 660–950; infrared                                    | 8.1                       | 940;240              | ND                              | 5; ND                                                                          | ND           |
| 12. Adly A et al (2021)     | Infrared      | I:904; infrared<br>C: 904 laser pucture;<br>infrared | I:20.1C:4                 | I:500;30<br>C:100:40 | I:650<br>C:100                  | I:3<br>C:7                                                                     | I:ND<br>C: 4 |
| 13. Adly B et al (2021)     | Infrared      | 808; infrared                                        | 7.5                       | ND;60                | 100                             | 5;ND                                                                           | ND           |
| 14. Muhamed et al (2021)    | GaAlAs; He-Ne | 830; infrared<br>632,8; red                          | ND<br>ND                  | 7.3; ND<br>300; ND   | ND<br>ND                        | ND; 3 sessions/ week                                                           | ND           |
| 15. Adly A et al (2022)     | Infrared      | 808; infrared                                        | 7.5                       | 100;60               | 100                             | 4; 6 sessions/ week                                                            | ND           |
| 16. Goldman et al. 1980     | Infrared      | 1060; infrared                                       | 15–25                     | ND; 0,3              | ND                              | MCP and PIP, ND                                                                | ND           |
| 17. Heussler et al., 1993   | Infrared      | 820; infrared                                        | 12                        | 50; ND               | ND                              | MCP and PIP, ND                                                                | ND           |
| 18. Zhuravleva et al., 2021 | Infrared      | 890; infrared                                        | ND                        | 5000;60–120          | ND                              | ND;ND                                                                          | ND           |

He-Ne: helium-neon; GaAlAs: gallium aluminum arsenide; AlAs: aluminum arsenide; ND: not described; MCP, metacarpophalangeal joint; PIP, proximal interphalangeal joint

<https://doi.org/10.1371/journal.pone.0291345.t002>

**Functional capacity.** Two studies [25, 30] evaluated functional capacity using the Health Assessment Questionnaire (HAQ) and one [24] using a Functional Scale with 8 items. Pooled data from these 3 RCTs, with a total of 136 participants, suggest there may be small or no difference in functional capacity between using laser infrared and sham (SMD -0.08; 95% CI -0.60 to 0.43; low quality of evidence) (Fig 3D). Hall et al. [27] evaluated functional capacity but presented data only in graphs without further information for analysis.

**Inflammation.** Two studies [25, 31] evaluated c-reactive protein (CRP) (in mg/dl) through blood collection. Pooled data from two studies, with 103 participants, suggest there may be small or no difference between using infrared laser or sham (MD = 0.18; 95% CI (-0.51 to 0.87) (Fig 3E). Meireles et al. [30], using a Likert scale, (1—no inflammation; 2- mild inflammation; 3-moderate inflammation; 4 strong inflammation; or 5—very strong inflammation), encountered a statistically significant difference (p = 0.012) in favor of the group that received infrared laser. Johannsen et al. [29] and Meireles et al. [30] reported they did not find a



| Study                                       | Risk of bias domains |               |               |               |               | Overall       |
|---------------------------------------------|----------------------|---------------|---------------|---------------|---------------|---------------|
|                                             | D1                   | D2            | D3            | D4            | D5            |               |
| Walker1987 et al.,(Pain)                    | High                 | Some concerns | Low           | High          | Some concerns | High          |
| Adly2017 et al.,(functional capacity)       | Some concerns        | High          | Some concerns | High          | Some concerns | High          |
| Adly2017 et al.,(Quality of life)           | Some concerns        | High          | Some concerns | High          | Some concerns | High          |
| Adly2017 et al.,(ROM)                       | Some concerns        | High          | Some concerns | Some concerns | Some concerns | High          |
| Adly2017 et al.,(Inflammation)              | Some concerns        | High          | Some concerns | Some concerns | Some concerns | High          |
| Miyagi1989 et al.,(Pain)                    | High                 | Some concerns | High          | High          | Some concerns | High          |
| Miyagi1989 et al.,(Functional capacity)     | High                 | Some concerns | Low           | High          | Some concerns | High          |
| Miyagi1989 et al.,(Morning stiffness)       | High                 | Some concerns | Low           | High          | Some concerns | High          |
| Miyagi1989 et al.,(Inflammation)            | High                 | High          | Low           | High          | Some concerns | High          |
| Miyagi1989 et al.,(Grip strength)           | High                 | Some concerns | Low           | High          | Some concerns | High          |
| Hall1994 et al.,(Pain)                      | Some concerns        | Some concerns | Some concerns | Low           | High          | High          |
| Hall1994 et al.,(Functional capacity)       | Some concerns        | Some concerns | Some concerns | Low           | Some concerns | High          |
| Hall1994 et al.,(Grip strength)             | Some concerns        | Some concerns | Some concerns | Low           | Some concerns | High          |
| Hall1994 et al.,(ROM)                       | Some concerns        | Some concerns | Some concerns | Low           | Some concerns | High          |
| Hall1994 et al.,(Morning stiffness)         | Some concerns        | Some concerns | Some concerns | Low           | High          | High          |
| Hall1994 et al.,(Disease activity)          | Some concerns        | Some concerns | Some concerns | Low           | High          | High          |
| Hall1994 et al.,(inflammation)              | Some concerns        | Some concerns | Some concerns | Low           | Some concerns | High          |
| Meireles2010 et al.,(Pain)                  | Some concerns        | Low           | Low           | Low           | Some concerns | Some concerns |
| Meireles2010 et al.,(Functional capacity)   | Some concerns        | Low           | Low           | Low           | Some concerns | Some concerns |
| Meireles2010 et al.,(Inflammation)          | Some concerns        | Low           | Low           | High          | Some concerns | High          |
| Meireles2010 et al.,(Morning stiffness)     | Some concerns        | Low           | Low           | Low           | Some concerns | Some concerns |
| Meireles2010 et al.,(Grip strength)         | Some concerns        | Low           | Low           | Low           | Some concerns | Some concerns |
| Meireles2010 et al.,(ROM)                   | Some concerns        | Low           | Low           | Low           | Some concerns | Some concerns |
| Palmgren1989 et al.,(Pain)                  | Some concerns        | High          | High          | Some concerns | Some concerns | High          |
| Palmgren1989 et al.,(Grip strength)         | Some concerns        | High          | High          | Low           | Some concerns | High          |
| Palmgren1989 et al.,(Morning stiffness)     | Some concerns        | High          | High          | Some concerns | Some concerns | High          |
| Palmgren1989 et al.,(Inflammation)          | Some concerns        | High          | High          | Low           | Some concerns | High          |
| Silva2099 et al.,(Pain)                     | High                 | Some concerns | Low           | Low           | Some concerns | High          |
| Ekim2007 et al.,(Pain)                      | Some concerns        | Some concerns | Low           | Low           | Some concerns | High          |
| Ekim2007 et al.,(Functional capacity)       | Some concerns        | Some concerns | Low           | Low           | Some concerns | High          |
| Ekim2007 et al.,(Grip strength)             | Some concerns        | Some concerns | Low           | Low           | Some concerns | High          |
| Johannsen1994 et al., (Pain)                | Some concerns        | Some concerns | Some concerns | Low           | Some concerns | High          |
| Johannsen1994 et al., (Functional capacity) | Some concerns        | Some concerns | Some concerns | Low           | Some concerns | High          |
| Johannsen1994 et al., (Grip strength)       | Some concerns        | Some concerns | Some concerns | Low           | Some concerns | High          |
| Johannsen1994 et al., (Morning stiffness)   | Some concerns        | Some concerns | Some concerns | Low           | Some concerns | High          |
| Johannsen1994 et al., (Inflammation)        | Some concerns        | Some concerns | Some concerns | Low           | Some concerns | High          |
| Bliddal1987 et al.,(Pain)                   | Some concerns        | High          | Low           | High          | Some concerns | High          |
| Bliddal1987 et al.,(Morning stiffness)      | Some concerns        | High          | Low           | High          | Some concerns | High          |
| Goats1996 et al.,(Pain)                     | High                 | High          | High          | High          | Some concerns | High          |
| Goats1996 et al.,(Functional capacity)      | High                 | High          | High          | Low           | Some concerns | High          |
| Goats1996 et al.,(Morning stiffness)        | High                 | High          | High          | High          | Some concerns | High          |
| Goats1996 et al.,(Inflammation )            | High                 | High          | High          | Low           | Some concerns | High          |
| Goats1996 et al.,(ROM )                     | High                 | High          | High          | Low           | Some concerns | High          |
| Goats1996 et al.,(Disease activity )        | High                 | High          | High          | Some concerns | Some concerns | High          |
| Adly2021A et al.,(Inflammation)             | Some concerns        | High          | Some concerns | High          | Some concerns | High          |
| Adly2021A et al.,(Quality of life)          | Some concerns        | High          | Some concerns | High          | Some concerns | High          |
| Adly2021A et al.,(Functional capacity)      | Some concerns        | High          | Some concerns | High          | Some concerns | High          |
| Adly2021B et al.,(Inflammation)             | Some concerns        | High          | Some concerns | High          | Some concerns | High          |
| Adly2021B et al.,(Quality of life)          | Some concerns        | High          | Some concerns | High          | Some concerns | High          |
| Adly2021B et al.,(Functional capacity)      | Some concerns        | High          | Some concerns | High          | Some concerns | High          |
| Muhammed2021 et al.,(Pain)                  | Some concerns        | Low           | Low           | High          | Low           | High          |
| Muhammed2021 et al.,(Morning stiffness)     | Some concerns        | Low           | Low           | High          | Low           | High          |
| Muhammed2021 et al.,(Disease activity)      | Some concerns        | Low           | Low           | High          | Low           | High          |
| Adly2022 et al.,(Inflammation)              | Some concerns        | High          | Some concerns | High          | Some concerns | High          |
| Adly2022 et al.,(Quality of life)           | Some concerns        | High          | Some concerns | High          | Some concerns | High          |
| Adly2022 et al.,(Functional capacity)       | Some concerns        | High          | Some concerns | High          | Some concerns | High          |
| Goldman1980 et al., (Pain)                  | High                 | High          | High          | High          | High          | High          |
| Goldman1980 et al.,(ROM)                    | High                 | Low           | High          | Some concerns | High          | High          |
| Goldman1980 et al.,(Grip strength)          | High                 | Low           | High          | Some concerns | High          | High          |
| Heussler1993 et al.,(Pain)                  | Some concerns        | High          | High          | High          | Some concerns | High          |
| Heussler1993 et al.,(Morning stiffness)     | Some concerns        | High          | High          | High          | Some concerns | High          |
| Heussler1993 et al.,(ROM)                   | Some concerns        | High          | High          | High          | Some concerns | High          |
| Heussler1993 et al.,(Grip strength)         | Some concerns        | High          | High          | High          | Some concerns | High          |
| Heussler1993 et al.,(Inflammation)          | Some concerns        | High          | High          | High          | Some concerns | High          |
| Zhuravleva2021 et al.,(Pain)                | Some concerns        | Low           | Low           | High          | Some concerns | High          |
| Zhuravleva2021 et al.,(Morning stiffness)   | Some concerns        | Low           | Low           | High          | Some concerns | High          |

Domains:  
 D1: Bias arising from the randomization process.  
 D2: Bias due to deviations from intended intervention.  
 D3: Bias due to missing outcome data.  
 D4: Bias in measurement of the outcome.  
 D5: Bias in selection of the reported result.

Judgement:  
 High  
 Some concerns  
 Low

Fig 2. Risk of bias in included studies.

<https://doi.org/10.1371/journal.pone.0291345.g002>

**a) Pain after treatment**

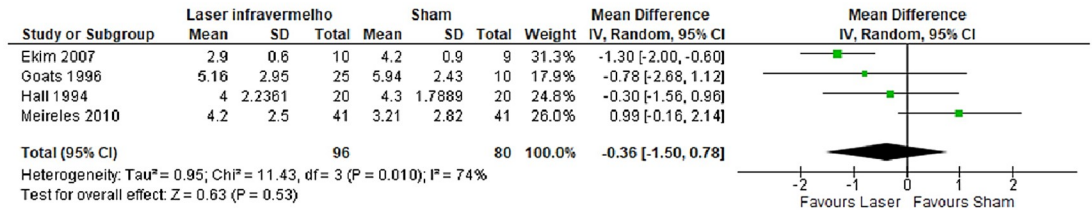

**b) Morning stiffness after treatment**

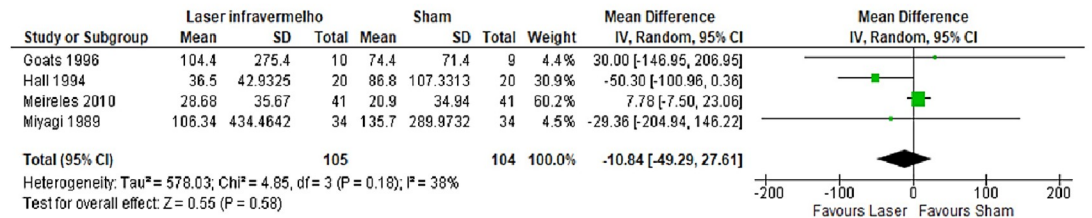

**c) Handgrip strength after treatment**

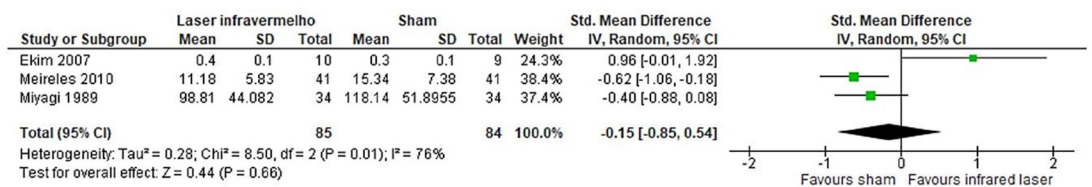

**d) Functional capacity after treatment**

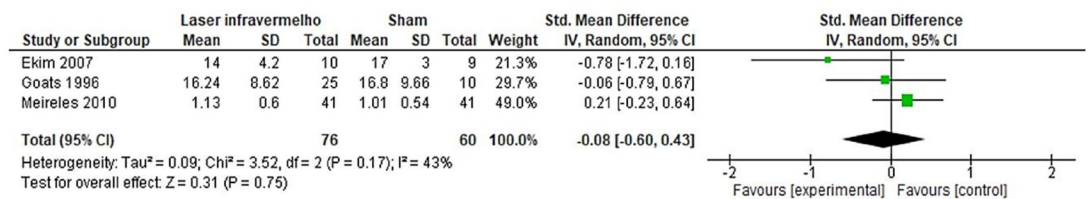

**e) Inflammation after treatment**

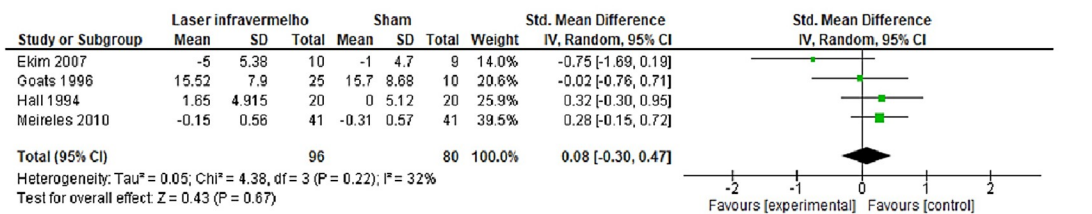

**f) Disease activity after treatment**

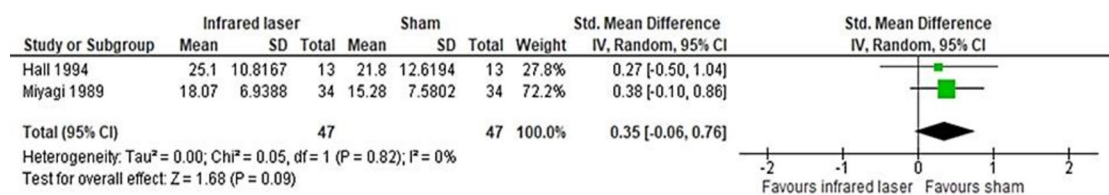

**Fig 3. Meta-analysis.**

<https://doi.org/10.1371/journal.pone.0291345.g003>

significant difference between groups and did not provide enough data for further analysis. Hall [27] presented data only in graphs without further information for analysis.

*Range of motion (ROM).* Meireles et al. [30] analyzed proximal interphalangeal (PIP) joints using a goniometry, results of this study with 82 participants found a small difference in ROM after 2 months ( $p = 0.021$  favoring control group). Ekim et al. [24] found no significant difference observed between active or placebo groups in ROM at the knee. Goldman et al. [26] and Heussler [28] reported no significant difference between groups for PIP range of motion. Hall et al. [27] presented data only in graphs without further information for analysis. These results suggest there may be small or no difference between laser infrared and sham on ROM (low certainty of evidence).

*Disease activity.* Hall et al. [27] used the Richie index and Miyagi et al. [31] used Lansbury. Pooled data from these studies with a total of 94 participants suggested that there may be small or no difference in disease activity between using infrared laser and sham (SMD 0.35; 95% CI  $-0.06$  to  $0.76$ ; low quality of evidence) (Fig 3F).

*Adverse events.* Johannsen et al. [29] reported adverse events related to interventions. In this study, two patients receiving infrared laser treatment had increased disease activity, requiring steroid treatment. These two patients were withdrawn from the study. Two other patients, one from each treatment group, complained of a burning sensation in the treated joints, but completed the study.

Ekim et al. [24] and Miyagi et al. [31] reported that no systemic or local side effects were reported during or after the treatment period. Heussler et al. [28] reported no significant difference between groups for side effects. Johannsen et al. [29] reported no side effects. Due to the few events and risk of bias in studies, the evidence is very uncertain about adverse effects of infrared laser compared to sham (very low certainty of evidence).

**Comparison: Red laser versus sham.** *Pain.* Two studies, Walker et al. [35] and Bliddal et al. [34], evaluated pain outcome after red laser. These studies were not sufficiently homogeneous to be pooled. Walker et al. [35] observed no difference between groups for the pain outcome. According to Bliddal et al. [34], red laser treatment is better than placebo in terms of pain relief. The quality of evidence for this outcome is very low.

*Morning stiffness.* Bliddal et al. [34] evaluated morning stiffness after 10 weeks of red laser. In this study, it was not possible to detect differences between red laser and sham treatment regarding relief of morning stiffness. The quality of evidence for this outcome is very low.

*Adverse events.* For Bliddal et al. [31], adverse effects were observed in 3 patients, who complained of a burning sensation in the irradiated joints—all in the laser-treated group. In these cases, the sensation disappeared within a few hours and none of the patients withdrew from the study. The quality of evidence for this outcome is very low.

**Comparison: Infrared laser versus laser acupuncture.** *Functional capacity.* The results of Adly et al. [38] with 40 participants suggest the evidence is very uncertain about the effects of infrared laser versus laser acupuncture, as assessed by the HAQ (MD 0.01; 95% CI  $-0.23$  to  $0.25$ ; very low quality of evidence).

*Quality of life.* The evidence is also very uncertain about the effects of infrared laser versus laser acupuncture in the quality of life using The Rheumatoid Arthritis Quality of Life Questionnaire (RAQoL), after 4 weeks (MD 4.05; 95% CI  $0.48$  to  $7.62$ ; very low quality of evidence).

*Inflammation.* We are uncertain about the effects of infrared laser versus laser acupuncture in inflammation as assessed with interleukin 6 (MD 36.03; 95% CI  $-0.72$  to  $72.79$ ; very low quality of evidence).

**Comparison: Laser acupuncture versus reflexology.** *Functional capacity.* The results of Adly [37] with 30 participants suggest the evidence is very uncertain about the effects of laser

acupuncture versus reflexology on functional capacity after 4 weeks, as assessed by the HAQ (MD 32.49; 95% CI 28.54 to 36.44; very low quality of evidence).

*Quality of life.* The evidence is also very uncertain about the effects of laser acupuncture versus reflexology in the quality of life using The Rheumatoid Arthritis Quality of Life Questionnaire (RAQoL), after 4 weeks (MD -4.05; 95% CI -9.18 to 1.08; very low quality of evidence).

*Inflammation.* We are uncertain about the effects of laser acupuncture versus reflexology in inflammation as assessed with interleukin 6 (MD 27.7; 95% CI -70.52 to 15.12; very low quality of evidence).

*Range of motion.* There is also very low quality of evidence on the effects of laser acupuncture versus reflexology in the range of motion, including evaluations of plantar flexion and dorsiflexion, wrist flexion and extension, and ulnar and radial deviation, although all differences were favorable to the group receiving laser acupuncture, except for ulnar deviation, where no significant difference between groups was found (Table 1).

**Comparison: Laser acupuncture + teletherapy + methotrexate versus teletherapy + methotrexate.** *Functional capacity.* The results of Adly et al. [38] with 60 participants suggest the evidence is very uncertain about the effects of laser acupuncture + teletherapy + methotrexate versus teletherapy + methotrexate, as assessed by the HAQ. In this study, the authors reported no significant difference between groups, without further data for analysis; very low quality of evidence.

*Quality of life.* We are uncertain about the effects of laser acupuncture versus reflexology in the quality of life using The Rheumatoid Arthritis Quality of Life Questionnaire (RAQoL). The authors found a significant difference between groups favoring laser acupuncture, with a mean difference of -4.533, without further data for analysis; very low quality of evidence.

*Inflammation.* We are uncertain about the effects of laser acupuncture versus reflexology in inflammation as assessed with interleukin 6. The authors found a significant difference between groups favoring laser acupuncture assessed using CRP and IL-6, with a mean difference of -34.68 and -41, respectively, without further data for analysis; very low quality of evidence.

**Comparison: Laser acupuncture + teletherapy versus teletherapy.** *Functional capacity.* The results of Adly et al. [39] with 60 participants suggest the evidence is very uncertain about the effects of laser acupuncture + teletherapy versus teletherapy on functional capacity, as assessed by the HAQ (MD 0.00-0.24 to 0.24; very low quality of evidence).

*Quality of life.* The evidence is also very uncertain about the effects of laser acupuncture + teletherapy versus teletherapy in the quality of life using The Rheumatoid Arthritis Quality of Life Questionnaire (RAQoL), after 4 weeks (MD -4.47; 95% CI -8.20 to -0.74; very low quality of evidence).

*Inflammation.* We are uncertain about the effects of laser acupuncture + teletherapy versus teletherapy in inflammation as assessed with interleukin 6 (MD -35.57; 95% CI -37.63 to -33.5, and MD -31.17; 95% CI -63.1 to 0.76; very low quality of evidence).

**Comparison: Infrared laser + red laser versus sham laser + naproxen.** *Pain.* The results of Al-Saraj et al. [40] with 24 participants suggest the evidence is very uncertain about the effects of infrared laser + red laser versus sham laser + naproxen on pain (MD -9.05; 95% CI -17.52 to -0.58; very low quality of evidence).

*Morning stiffness.* The results suggest the evidence is very uncertain about the effects of infrared laser + red laser versus sham laser + naproxen on morning stiffness (MD -7.4; 95% CI -13.4 to -1.4; very low quality of evidence).

*Inflammation.* We are uncertain about the effects of infrared laser + red laser versus sham laser + naproxen in inflammation as assessed with erythrocyte sedimentation rate (ESR) (MD -4.1; 95% CI -10.26 to 2.06; very low quality of evidence).



*Disease activity.* The evidence is also very uncertain about the effects of infrared laser + red laser versus sham laser + naproxen in the quality of life using Disease Activity Score 28 (DAS-28) (MD -0.49; 95% CI -1.00 to 0.02; very low quality of evidence).

*Adverse events.* The evidence is also very uncertain about the adverse effects of infrared laser + red laser versus sham laser + naproxen (RR 0.14; 95% CI 0.01 to 2.50; very low quality of evidence).

**Comparison: Infrared laser + red laser versus naproxen.** *Pain.* The results of Al-Saraj et al. [40] with 22 participants suggest the evidence is very uncertain about the effects of infrared laser + red laser versus sham laser + naproxen on pain (MD -7.3; 95% CI -17.33 to 2.73; very low quality of evidence).

*Morning stiffness.* The results of this study [40] with 22 participants suggest the evidence is very uncertain about the effects of infrared laser + red laser versus sham laser + naproxen on morning stiffness (MD -9.50; 95% CI -15.10 to -3.90; very low quality of evidence).

*Inflammation.* We are uncertain about the effects of infrared laser + red laser versus sham laser + naproxen in inflammation as assessed with ESR (MD -4.50; 95% CI -68.48 to 59.48; very low quality of evidence).

*Disease activity.* The evidence is also very uncertain about the effects of infrared laser + red laser versus sham laser + naproxen in the quality of life using Disease Activity Score 28 (DAS-28) (MD -0.22; 95% CI -0.67 to 0.23; very low quality of evidence).

*Adverse events.* The evidence is also very uncertain about the adverse effects of infrared laser + red laser versus naproxen (RR 0.17; 95% CI 0.01 to 3.16; very low quality of evidence).

**Comparison: Infrared laser + methotrexate + non-steroidal anti-inflammatory drugs (NSAIDs) on demand versus methotrexate + NSAIDs on demand.** *Pain.* Zhuravleva et al. [41] compared Infrared laser + methotrexate + NSAIDs versus methotrexate + NSAIDs using a Visual Analogue Scale (VAS). This study found a small difference between using infrared laser and control after 6 months of treatment (MD -0.51; IC 95% -0.60 to -0.42; low-certainty of evidence).

*Duration of morning stiffness.* The results of this study [41] suggest participants in the laser group had a shorter duration of morning stiffness compared to control (MD -17.8; IC 95% -19.67 to -15.93; low certainty of evidence).

*Number of patients needing NSAID.* Zhuravleva et al. [41] found that laser led to a decrease in the frequency of the need for NSAIDs compared to control (RR 2.1; IC 95% 1.09 to 4.05; low certainty of evidence).

## Discussion/Conclusion

### Main findings

This systematic review evaluated the current evidence on the effectiveness of LLLT in adult patients with RA. The last systematic review evaluating exclusively adults with RA was published [12] 17 years ago, showing the importance of updating the evidence through this systematic review. Our results show that there is low-quality evidence to suggest that there may be small to no differences between using infrared laser using sham in terms of pain, morning stiffness, grip strength, functional capacity, inflammation, range of motion, disease activity and adverse events. We also found that the evidence is very uncertain about the effects of red laser versus sham in pain, morning stiffness and adverse events and about the effect of laser acupuncture versus reflexology in functional capacity, quality of life and inflammation.

In this systematic review, we included 18 RCTs, of which ten showed there may be no difference between using infrared laser and using sham in any of the outcomes evaluated. Our results are different from the results of Brosseau et al. [12], where LLLT was found to reduce

pain and stiffness in a short period when compared to sham. This difference in result may be due to the fact that, in our review, we chose to separate the LLLT with red wavelength from the infrared wavelength, since the infrared LLLT penetrates more into the tissue than does the red laser [9], which Brosseau et al. [12] was unable to do as they included only a few heterogeneous studies. Furthermore, no certainty of evidence assessment was conducted in the systematic review by Brosseau et al. [12].

It is noteworthy that in Brosseau et al. [12], only studies published in French and English were included, which resulted in the inclusion of 5 studies. In this review, the authors reported that despite the positive results found, it was not possible to determine which LLLT parameters are responsible for these effects. Noting that, it is important that future reviews separate the LLLT parameters in the meta-analyses according to wavelength, treatment time, dose and laser application site when possible.

We also found that the evidence is very uncertain about the effects of red laser versus sham in pain, morning stiffness, and adverse events and about the effect of laser acupuncture versus reflexology in functional capacity, quality of life and inflammation. Some studies suggest that LLLT has promising results in controlling joint inflammation [43], reducing pain, tumor necrosis factor alpha (TNF- $\alpha$ ) [44] and modulating the inflammatory process [45]. However, to achieve these effects, LLLT depends on specific and important parameters that determine the interaction of laser light with tissue. However, the heterogeneity of the included studies in terms of sample size, treatment time, place of LLLT application and lack of uniformity in the presentation of LLLT parameters make it difficult to interpret the results found and the effectiveness of this resource cannot be proven.

We consider as limitations of this study the inclusion of trials without adequate randomization, studies with small sample data that favor imprecision, resulting in low estimation of effects, and the heterogeneity of laser parameters found. Another limitation of this review would be the estimation of long-term effects that were observed in only two studies. We consider the strengths of this systematic review to be the use of a rigorous methodology, assessment of the risk of bias and the quality of evidence for each outcome, as well as the conduction of broad searches, without publication date or language restrictions.

In conclusion, infrared laser may not be superior to sham in RA patients. There is insufficient evidence to support or refute the effectiveness of red laser, laser acupuncture and reflexology for treating patients with RA. Further studies with more rigorous scientific methodology and larger sample size are needed to monitor the effects of LLLT in patients with RA in the long term.

## Supporting information

### **S1 Table. Search strategy for included studies.**

(DOCX)

### **S2 Table. Preferred Reporting Items for Systematic Reviews and Meta-Analysis (PRISMA).**

(DOCX)

### **S3 Table. Studies awaiting classification.**

(DOCX)

### **S4 Table. Grading of Recommendations Assessment, Development and Evaluation**

**(GRADE).**

(DOCX)

## Author Contributions

**Methodology:** Ingrid Lourinho, Tamara Sousa, Roger Jardim, Ana Carolina Pinto, Natália Iosimuta.

## References

1. Scherer HU, Häupl T, Burmester GR. The etiology of rheumatoid arthritis. *J Autoimmun* 2020; 110:102400. <https://doi.org/10.1016/j.jaut.2019.102400> PMID: 31980337
2. Almutairi K, Nossent J, Preen D, Keen H, Inderjeeth C. The global prevalence of rheumatoid arthritis: a meta-analysis based on a systematic review. *Rheumatol Int* 2021; 41:863–77. <https://doi.org/10.1007/s00296-020-04731-0> PMID: 33175207
3. Goeldner I, Skare TL, de Messias Reason IT, Nishihara RM, Silva MB, da Rosa Utiyama SR. Anti-cyclic citrullinated peptide antibodies and rheumatoid factor in rheumatoid arthritis patients and relatives from Brazil. *Rheumatology* 2010; 49:1590–3. <https://doi.org/10.1093/rheumatology/keq134> PMID: 20457731
4. Knittle K, De Gucht V, Hurkmans E, Vlieland TV, Maes S. Explaining Physical Activity Maintenance After a Theory-Based Intervention Among Patients With Rheumatoid Arthritis: Process Evaluation of a Randomized Controlled Trial. *Arthritis Care Res (Hoboken)* 2016; 68:203–10. <https://doi.org/10.1002/acr.22647> PMID: 26137923
5. Hsieh P-H, Wu O, Geue C, McIntosh E, McInnes IB, Siebert S. Economic burden of rheumatoid arthritis: a systematic review of literature in biologic era. *Ann Rheum Dis* 2020; 79:771–7. <https://doi.org/10.1136/annrheumdis-2019-216243> PMID: 32245893
6. Smolen JS, Breedveld FC, Burmester GR, Bykerk V, Dougados M, Emery P, et al. Treating rheumatoid arthritis to target: 2014 update of the recommendations of an international task force. *Ann Rheum Dis* 2016; 75:3–15. <https://doi.org/10.1136/annrheumdis-2015-207524> PMID: 25969430
7. Conceição JS, Sinhorim LMB, Martins TB, De Araújo FGS. Abordagem fisioterapêutica de pacientes com artrite reumatoide: revisão de literatura. *Revista Arquivos de Ciências Da Saúde* 2015; 22:14. <https://doi.org/10.17696/2318-3691.22.1.2015.20>
8. Ailioaie LM, Litscher G. Molecular and Cellular Mechanisms of Arthritis in Children and Adults: New Perspectives on Applied Photobiomodulation. *Int J Mol Sci* 2020; 21:6565. <https://doi.org/10.3390/ijms21186565> PMID: 32911717
9. Dompe C, Moncrieff L, Matys J, Grzech-Leśniak K, Kocherova I, Bryja A, et al. Photobiomodulation—Underlying Mechanism and Clinical Applications. *J Clin Med* 2020; 9:1724. <https://doi.org/10.3390/jcm9061724> PMID: 32503238
10. Zhao X, Zuo F, Chen E, Bi Y, Cao Y, Yuan Y, et al. Photodynamic therapy for synovial hyperplasia in patients with refractory rheumatoid arthritis: a study protocol for a randomized, double-blind, blank-controlled prospective trial. *Trials* 2021; 22:685. <https://doi.org/10.1186/s13063-021-05640-8> PMID: 34625107
11. Lemos GA, Rissi R, de Souza Pires IL, de Oliveira LP, de Aro AA, Pimentel ER, et al. Low-level laser therapy stimulates tissue repair and reduces the extracellular matrix degradation in rats with induced arthritis in the temporomandibular joint. *Lasers Med Sci* 2016; 31:1051–9. <https://doi.org/10.1007/s10103-016-1946-3> PMID: 27147076
12. Brosseau L, Welch V, Wells GA, de Bie R, Gam A, Harman K, et al. Low level laser therapy (Classes I, II and III) for treating rheumatoid arthritis. *Cochrane Database of Systematic Reviews* 2005;2010. <https://doi.org/10.1002/14651858.CD002049.pub2> PMID: 16235295
13. Aletaha D, Neogi T, Silman AJ, Funovits J, Felson DT, Bingham CO, et al. 2010 Rheumatoid arthritis classification criteria: An American College of Rheumatology/European League Against Rheumatism collaborative initiative. *Arthritis Rheum* 2010; 62:2569–81. <https://doi.org/10.1002/art.27584> PMID: 20872595
14. Arnett FC, Edworthy SM, Bloch DA, Mcshane DJ, Fries JF, Cooper NS, et al. The american rheumatism association 1987 revised criteria for the classification of rheumatoid arthritis. *Arthritis Rheum* 1988; 31:315–24. <https://doi.org/10.1002/art.1780310302> PMID: 3358796
15. Felson DT, Smolen JS, Wells G, Zhang B, van Tuyl LHD, Funovits J, et al. American College of Rheumatology/European League Against Rheumatism Provisional Definition of Remission in Rheumatoid Arthritis for Clinical Trials. *Ann Rheum Dis* 2011; 70:404–13. <https://doi.org/10.1136/ard.2011.149765> PMID: 21292833
16. Ouzzani M, Hammady H, Fedorowicz Z, Elmagarmid A. Rayyan—a web and mobile app for systematic reviews. *Syst Rev* 2016; 5:210. <https://doi.org/10.1186/s13643-016-0384-4> PMID: 27919275



17. Schünemann HJ, Higgins JP, Vist GE, Glasziou P, Akl EA, Skoetz N, et al. Completing 'Summary of findings' tables and grading the certainty of the evidence. In: Higgins JPT, Thomas J, Chandler J, Cumpston M, Li T, Page MJ, Welch VA (editors). *Cochrane Handbook for Systematic Reviews of Interventions version 6.3 (updated February 2022)*. Cochrane Handbook for Systematic Reviews of Interventions version 6.3, 2022.
18. Higgins JPT, Altman DG, Gotzsche PC, Juni P, Moher D, Oxman AD, et al. The Cochrane Collaboration's tool for assessing risk of bias in randomised trials. *BMJ* 2011; 343:d5928–d5928. <https://doi.org/10.1136/bmj.d5928> PMID: 22008217
19. Higgins JPT, Thomas J, Chandler J, Cumpston M, Li T, Page MJ, et al. *Cochrane Handbook for Systematic Reviews of Interventions version 6.3 (updated February 2022)*. Appendix A: Guide to the contents of a Cochrane Methodology protocol and review. A.6.4 Characteristics of studies awaiting classification. vol. version 6.3. 2022.
20. Lefebvre C, Glanville J, Briscoe S, Featherstone R, Littlewood A, Marshall C, et al. Chapter 4: Searching for and selecting studies. *Cochrane Handbook for Systematic Reviews of Interventions version 6.3 (updated February 2022)*. In: Higgins JPT, Thomas J, Chandler J, Cumpston M, Li T, Page MJ, et al., editors. *Cochrane*, 2022., 2022.
21. Asada K, Yutani Y, Sakawa A, Shimazu A. Clinical application of GAALAS 830 nm diode laser in treatment of rheumatoid arthritis. *Laser Ther* 1991; 3:77–82. <https://doi.org/10.5978/islm.91-OR-11>.
22. Obata J, Yanase M, Honmura A. Evaluation of acute pain-relief effects of low power laser therapy on rheumatoid arthritis by thermography. *Laser Ther* 1990; 2:28.
23. Yudo K. Study for laser therapy against arthritis in patients with rheumatoid arthritis. 2016.
24. Ekim A, Armagan O, Tascioglu F, Oner C, Colak M. Effect of low level laser therapy in rheumatoid arthritis patients with carpal tunnel syndrome. *Swiss Med Wkly* 2007; 137:347–52. <https://doi.org/10.4414/smw.2007.11581> PMID: 17629805
25. Goats GC, Hunter JA, Flett E, Stirling A. Low Intensity Laser and Phototherapy for Rheumatoid Arthritis. *Physiotherapy* 1996; 82:311–20. [https://doi.org/10.1016/S0031-9406\(05\)66866-6](https://doi.org/10.1016/S0031-9406(05)66866-6).
26. Goldman JA, Chiapella T, Casey H. Laser Therapy of Rheumatoid Arthritis. *Laser in Surgery and Medicine* 1980; 1:93–101. <https://doi.org/10.1002/lsm.1900010110> PMID: 7038361
27. Hall J, Clarke Ak, Elvins Dm, Ring Efj. Low level laser therapy is ineffective in the management of rheumatoid arthritic finger joints. *Rheumatology* 1994; 33:142–7. <https://doi.org/10.1093/rheumatology/33.2.142> PMID: 8162479
28. Heussler JK, Hinchey G, Margiotta E, Quinn R, Butler P, Martin J, et al. A double blind randomised trial of low power laser treatment in rheumatoid arthritis. *Ann Rheum Dis* 1993; 52:703–6. <https://doi.org/10.1136/ard.52.10.703> PMID: 8257205
29. Johannsen F, Hauschild B, Remvig L, Johnsen V, Petersen M, Bieler T. Low Energy Laser Therapy in Rheumatoid Arthritis. *Scand J Rheumatol* 1994; 23:145–7. <https://doi.org/10.3109/03009749409103048> PMID: 8016587
30. Meireles SM, Jones A, Jennings F, Suda AL, Parizotto NA, Natour J. Assessment of the effectiveness of low-level laser therapy on the hands of patients with rheumatoid arthritis: a randomized double-blind controlled trial. *Clin Rheumatol* 2010; 29:501–9. <https://doi.org/10.1007/s10067-009-1347-0> PMID: 20082104
31. Miyagi K, Ohotani Y, Suzuki S, Amano A, Azuma T, Yoshizawa H, et al. Double blind comparative study on the effect of low energy laser irradiation to rheumatoid arthritis. *The Journal of The Japanese Society of Balneology, Climatolgy and Physical Medicine* 1989:117–26.
32. Palmgren N, Jensen G, Kamma K, Windelin M, Colov H. Low-power laser therapy in rheumatoid arthritis. *Lasers Med Sci* 1989; 4:193–6.
33. Silva DP, Novaretti AP de OC, Baldan C. Effect analgesic of low intensity laser (LILT) in rheumatoid arthritis acute. *Rev Inst Ciênc Saúde* 2009; 27:35–8.
34. Bliddal H, Hellesen C, Ditlevsen P, Asselberghs J, Lyager L. Soft-laser Therapy of Rheumatoid Arthritis. *Scand J Rheumatol* 1987; 16:225–8. <https://doi.org/10.3109/03009748709102921> PMID: 3629205
35. Walker JB, Akhanjee LK, Cooney MM, Goldstein J, Tamayoshi S, Segal-Gidan F. Laser Therapy for Pain of Rheumatoid Arthritis. *Clin J Pain* 1987; 3:54–9. <https://doi.org/10.1097/00002508-198703010-00009>.
36. Adly AS, Serry ZM, Shehata M, Amr M, Abdeen HAA. Effects of laser therapy versus laser acupuncture on rheumatoid arthritis elderly patients. *European Journal of Molecular & Clinical Medicine* 2021:2717–25. <https://doi.org/10.31838/ejmcm.08.03.316>.
37. Adly AS, Adly AS, Adly MS, Serry ZMH. Laser acupuncture versus reflexology therapy in elderly with rheumatoid arthritis. *Lasers Med Sci* 2017; 32:1097–103. <https://doi.org/10.1007/s10103-017-2213-y> PMID: 28451815

38. Adly AS, Adly AS, Adly MS. Effects of laser acupuncture tele-therapy for rheumatoid arthritis elderly patients. *Lasers Med Sci* 2022; 37:499–504. <https://doi.org/10.1007/s10103-021-03287-0> PMID: [33738615](https://pubmed.ncbi.nlm.nih.gov/33738615/)
39. Adly A, Adly A, Adly M, Ali M. A novel approach utilizing laser acupuncture teletherapy for management of elderly-onset rheumatoid arthritis: A randomized clinical trial. *J Telemed Telecare* 2021; 5:298–306. <https://doi.org/10.1177/1357633X211009861> PMID: [33966520](https://pubmed.ncbi.nlm.nih.gov/33966520/)
40. Al-Saraj MJA, Al-Ethary ZY, Al-Attar ZI. The Effect of Low Level Laser Therapy on Early Onset Rheumatoid Arthritis Patients. *Iraqi journal of medical sciences* 2021; 19:126–33.
41. Zhuravleva N, Karzakova L, Kudryashov S, Petrova E. Ab0713 evaluation of the effectiveness of laser therapy in the treatment of rheumatoid arthritis. *Ann Rheum Dis* 2021; 80:1388.1–1388. <https://doi.org/10.1136/annrheumdis-2021-eular.238>.
42. Adly AS, Adly AS, Adly MS, Ali MF. A novel approach utilizing laser acupuncture teletherapy for management of elderly-onset rheumatoid arthritis: A randomized clinical trial. *J Telemed Telecare* 2021; 27:298–306. <https://doi.org/10.1177/1357633X211009861> PMID: [33966520](https://pubmed.ncbi.nlm.nih.gov/33966520/)
43. Alghadir A, Omar MTA, Al-Askar AB, Al-Muteri NK. Effect of low-level laser therapy in patients with chronic knee osteoarthritis: a single-blinded randomized clinical study. *Lasers Med Sci* 2014; 29:749–55. <https://doi.org/10.1007/s10103-013-1393-3> PMID: [23912778](https://pubmed.ncbi.nlm.nih.gov/23912778/)
44. Aimbire F, Albertini R, Pacheco MTT, Castro-Faria-Neto HC, Leonardo PSLM, Iversen VV, et al. Low-Level Laser Therapy Induces Dose-Dependent Reduction of TNF $\alpha$  Levels in Acute Inflammation. *Photomed Laser Surg* 2006; 24:33–7. <https://doi.org/10.1089/pho.2006.24.33>.
45. Yamaura M, Yao M, Yaroslavsky I, Cohen R, Smotrich M, Kochevar IE. Low level light effects on inflammatory cytokine production by rheumatoid arthritis synoviocytes. *Lasers Surg Med* 2009; 41:282–90. <https://doi.org/10.1002/lsm.20766> PMID: [19347944](https://pubmed.ncbi.nlm.nih.gov/19347944/)
